# Supplementary material for: Heterologous expression of 2-methylisoborneol / 2 methylenebornane biosynthesis genes in Escherichia coli yields novel C11-terpenes
Source: PLOS journal article supplement (doi:10.1371/journal.pone.0196082), 2018-04-19

S6 Fig. Mass spectra of all compounds with unknown structure listed in Table 3 or S2 Table

Compound: #8

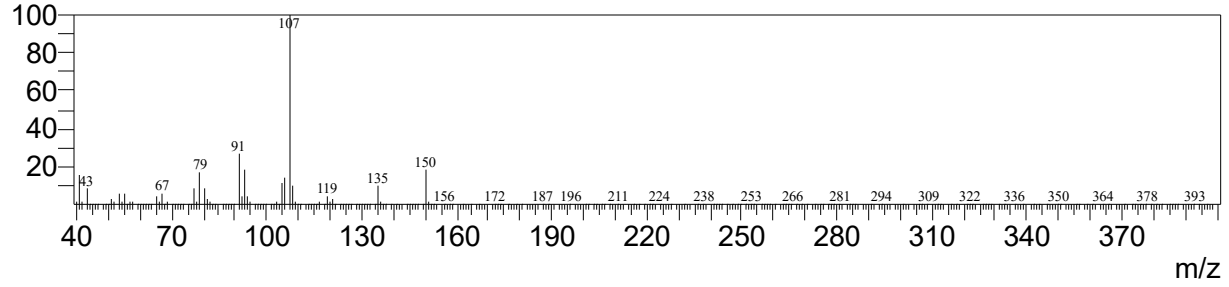

Compound: #17

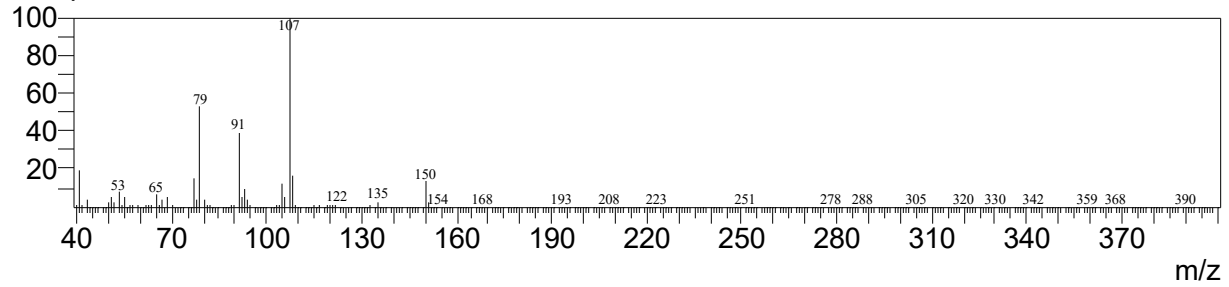

Compound: #19

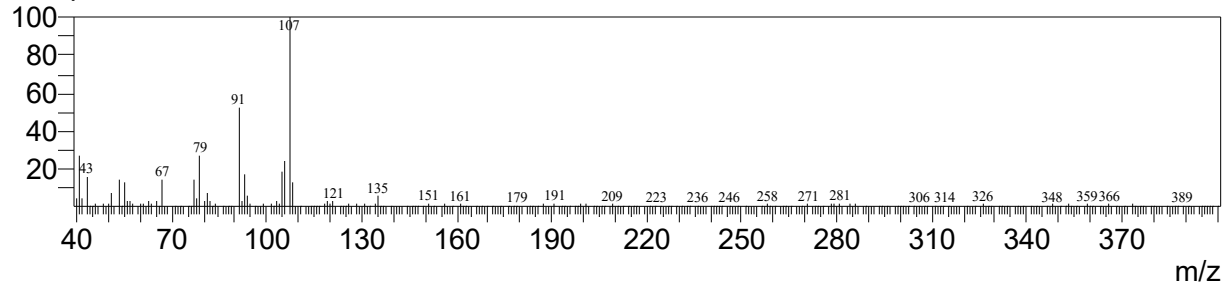

Compound: #20

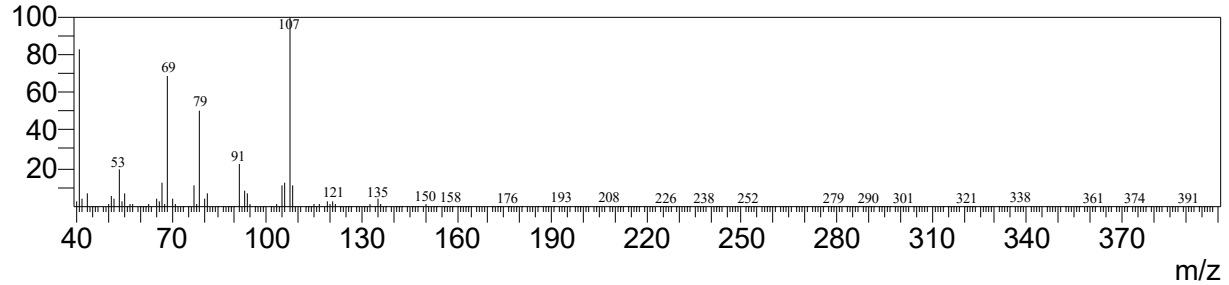

Compound: #22

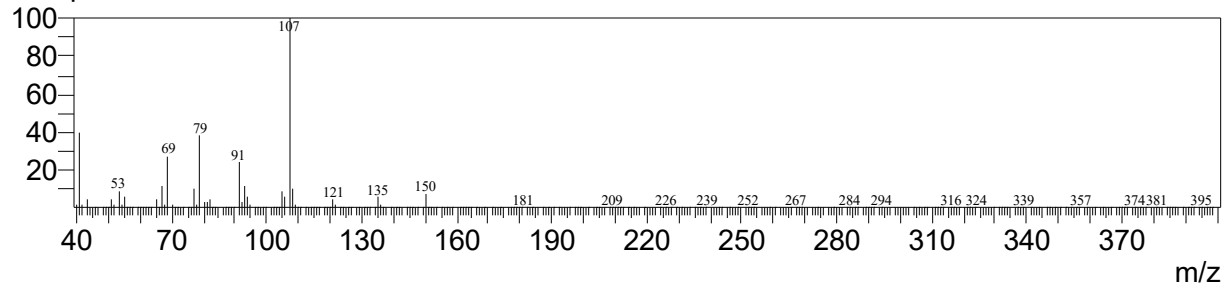

Compound: #24

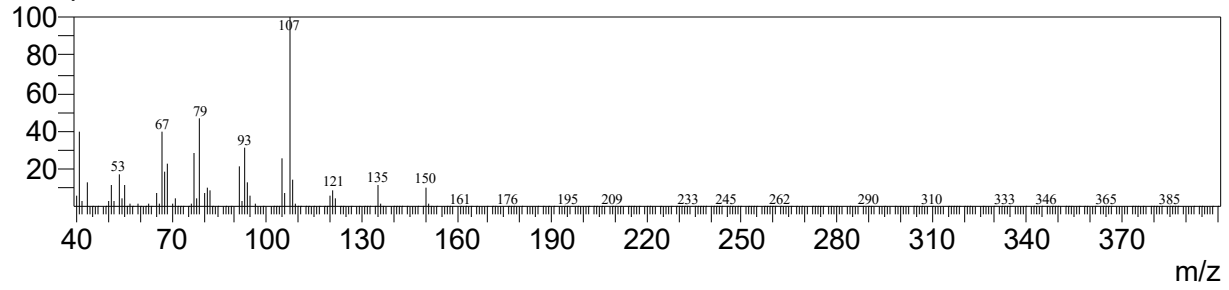

Compound: #25

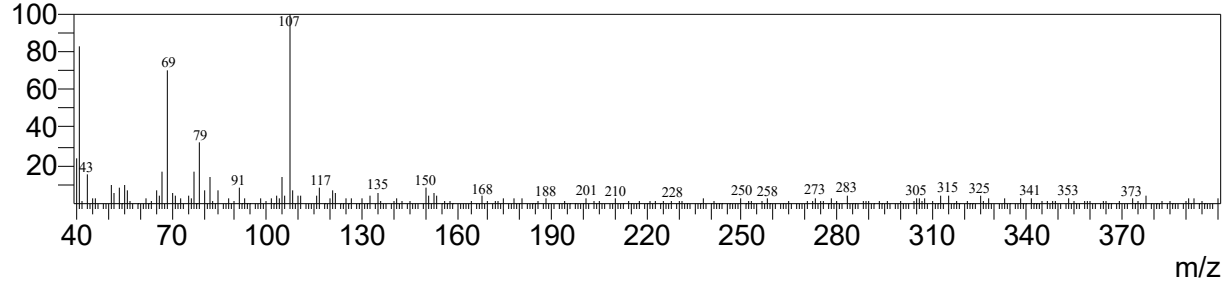

Compound: #27

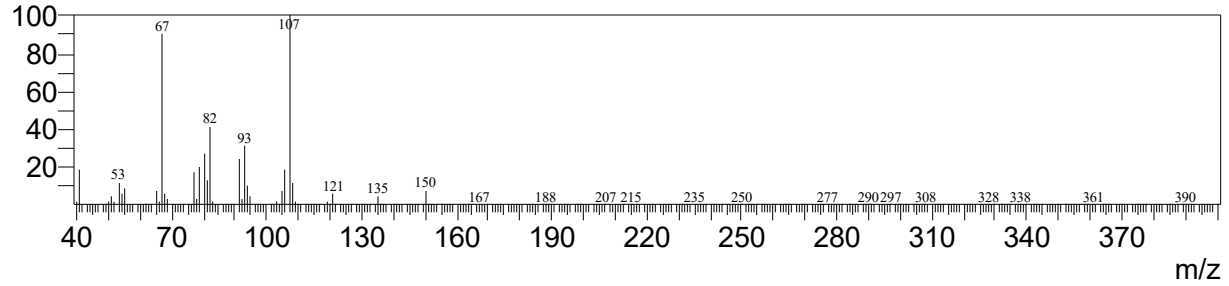

Compound: #28

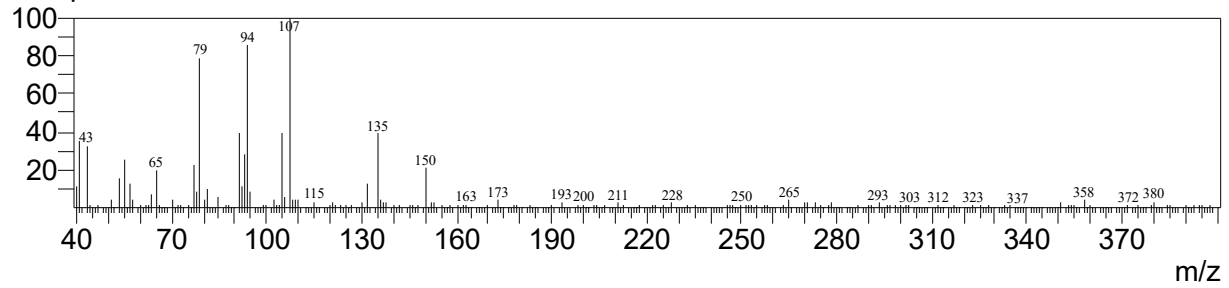

Compound: #30

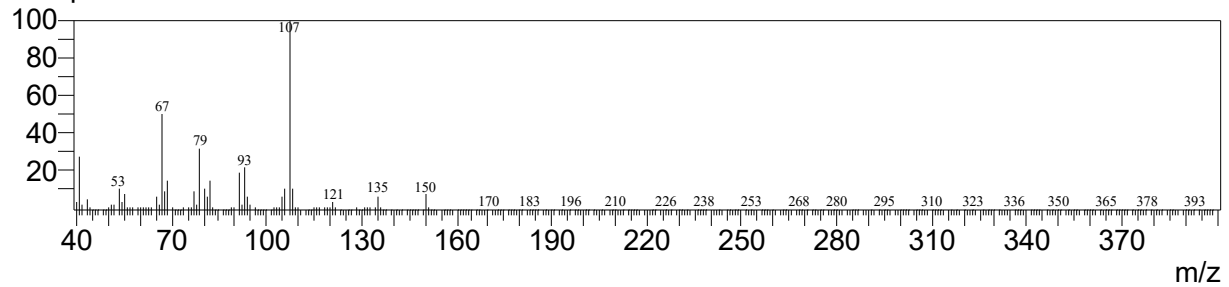

Compound: #31

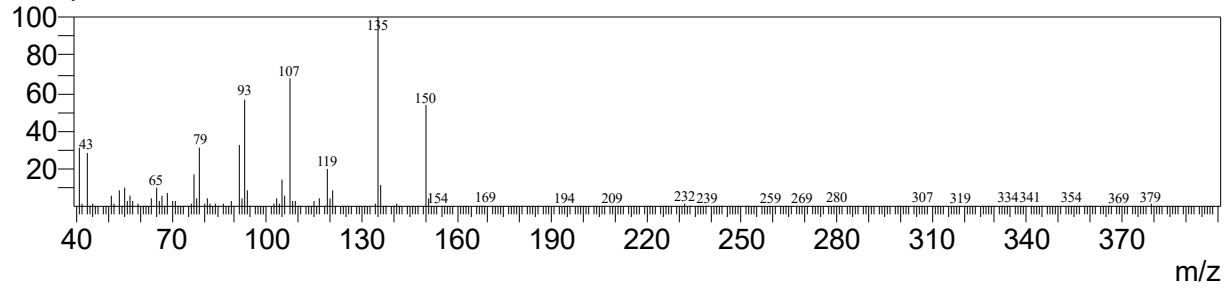

Compound: #32

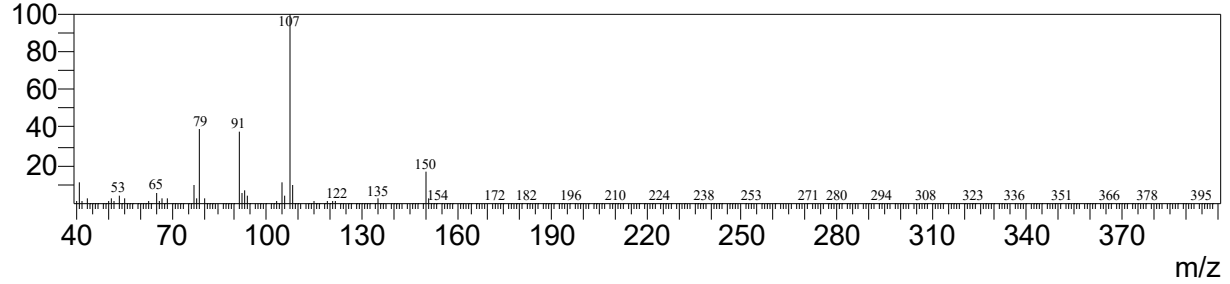

Compound: #35

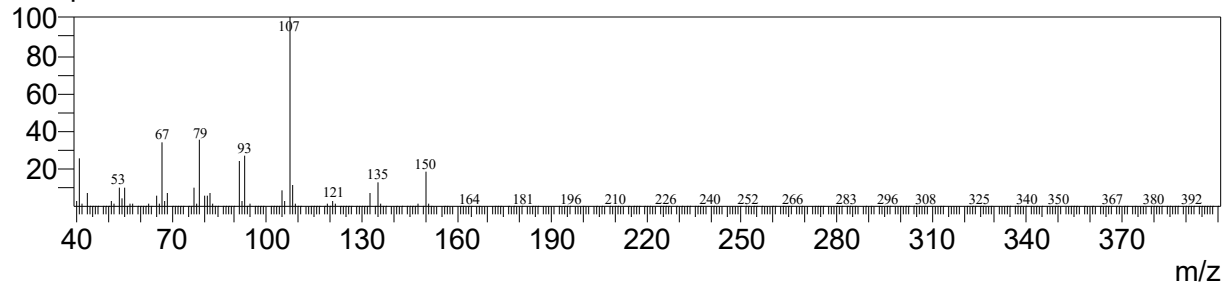

Compound: #36

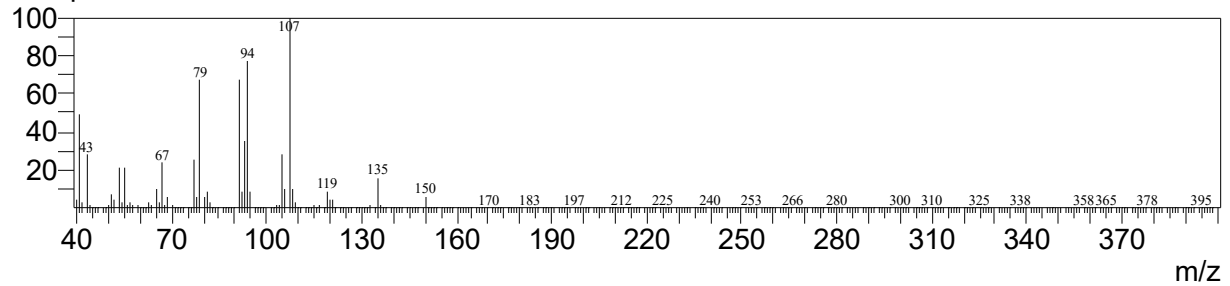

Compound: #41

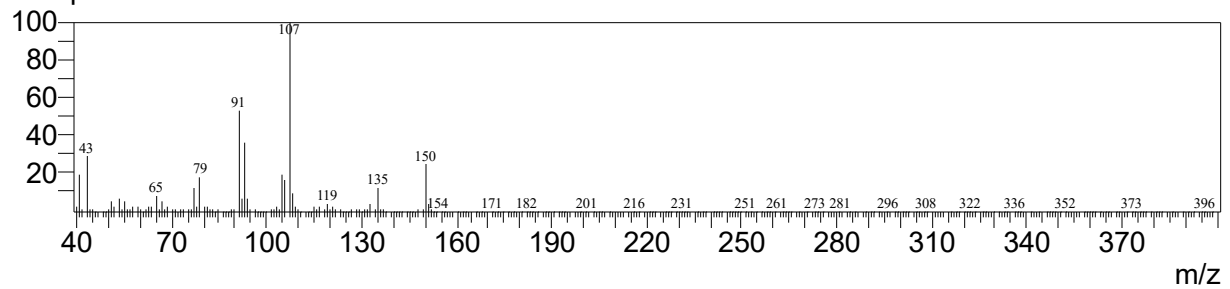

Compound: #47

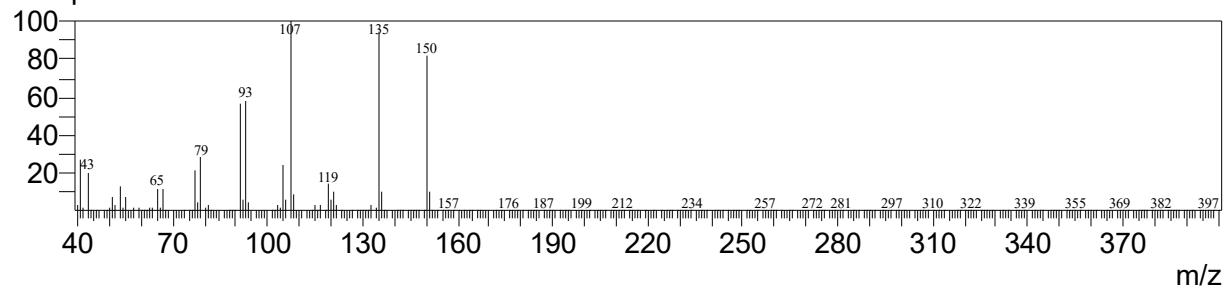

Compound: #49

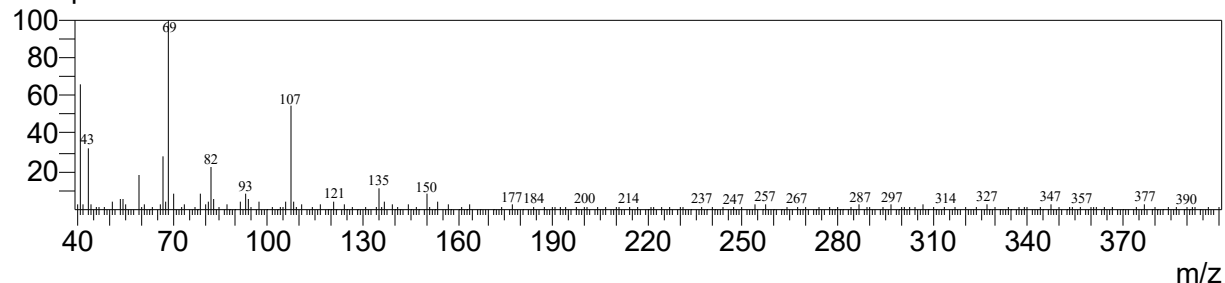

Compound: #51

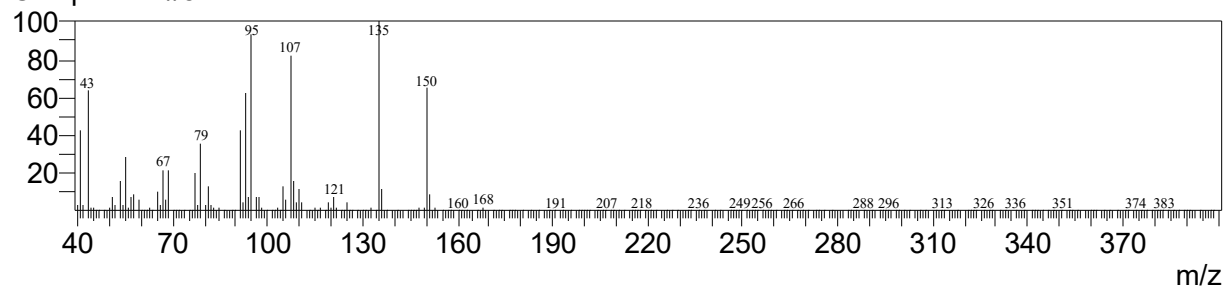

Compound: #55

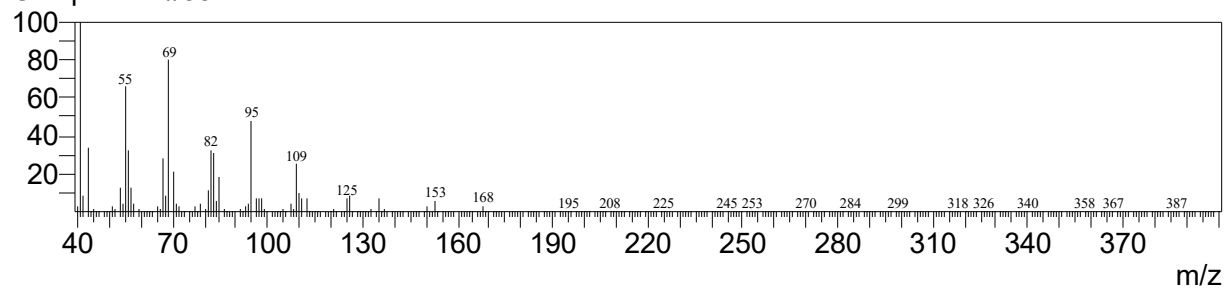

Compound: #59

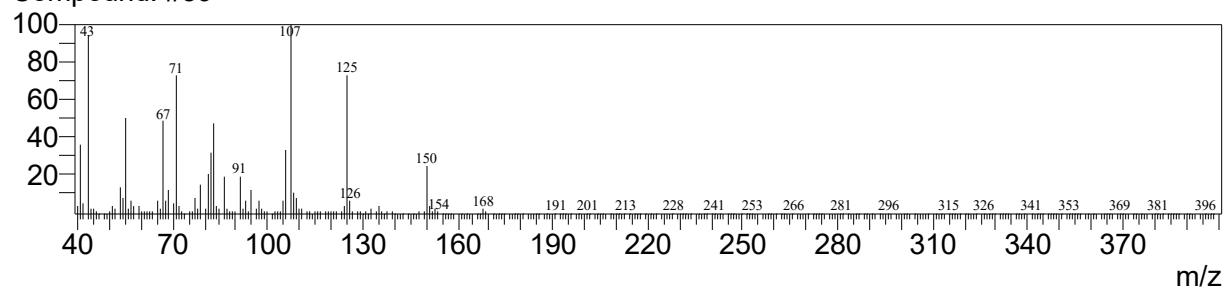

Compound: #6

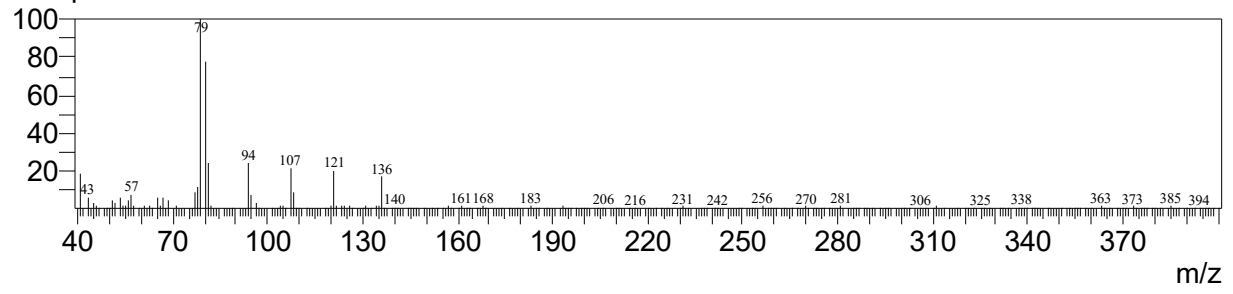

Supplement: S8 (10.1371/journal.pone.0196082.s008) [file journal.pone.0196082.s008.pdf]
