# Supplementary material for: Heterologous expression of 2-methylisoborneol / 2 methylenebornane biosynthesis genes in Escherichia coli yields novel C11-terpenes
Source: PubMed Central journal article supplement (PMC5908152; doi:10.1371/journal.pone.0196082), 2018-04-19
Supplement: pone.0196082.s003.pdf [file pone.0196082.s003.pdf]

### S1 Fig. *gppmtase* sequence optimized in codon usage for *E. coli*

```
1   ATGACCACGAAACCACCAC CGCAACCCGCGACCGCGAAAA TTCCTGCTCCGGCAACCCCG TATCAAGAAGATATTGCACG TTATTGGAATAATGAAGCCC
101  GTCCGGTTAATCTGCGTCTG GGTGATGTTGATGGCCTGTA TCACCATCATTATGGTATTG GTCCGGTTGATCGTGCAGCC CTGGGTGATCCTGAACATTC
201  AGAATATGAAAAAAGTGA TCGCCGAACGCATCGTCTG GAAAGCGCACAGGCAGAATT TCTGATGGATCATCTGGGTC AGGCAGGTCGGATGATACC
301  CTGGTTGATGCAGGTTGTGG TCGTGGTGGTAGCATGGTTA TGGCACATCGTCTGTTTGGT AGCCGTGTGGAAGGTGTTAC CTTGAGCGCAGCACAGGCCG
401  ATTTTGGTAATCGTCTGCA CGTGAACGCGTATTGATGA TCATGTCGTAGTCTGTTT GCAATATGCTGGATACCCCG TTGATAAAGGTGCAGTTAC
501  CGCAAGCTGGAATAACGAAA GCACCATGTATGTTGACCTG CATGACCTGTTTAGCGAACA TAGCCGTTTTCTGAAAGTTG GTGGTCGCTATGTTACCATT
601  ACAGGTTGTTGGAATCCGCG TTATGGCCAGCCGAGCAAAAT GGGTTAGCCAGATTAATGCA CATTGTTGAGTCAACATTCA TAGCCGTCGCGAATATCTGC
701  GTGCAATGGCAGATAAATCGT CTGGTCCGCATACCATTTG TGATCTGACACCGGATACCC TGCCGTATTGGGAACGCGT GCGACCAGCAGCCTGGTTAC
801  CGGTATTGAAAAAGCATTTA TCGAGAGCTATCGTGATGGC AGCTTTCAGTATGTTCTGAT TGCCGCAGATCGTGTGTA
```
