# Supplementary material for: Heterologous expression of 2-methylisoborneol / 2 methylenebornane biosynthesis genes in Escherichia coli yields novel C11-terpenes
Source: PubMed Central journal article supplement (PMC5908152; doi:10.1371/journal.pone.0196082), 2018-04-19
Supplement: pone.0196082.s005.pdf [file pone.0196082.s005.pdf]

## S2 Fig. *mbsp* sequence optimized in codon usage for *E. coli*

```
1   ATGAATCAGAGCAGCAGCGC  ACGTACACCGCGTAGCGCAA  CCGCACCGTTTATTGTTCTG  GCAGTTCGTTGTCCGCCTCC  GACCCGTATTGATGAAGCAC
101  TGGGTCAAGAAGTTAACGAA  CGTCTGATGGAATGGATTAG  CAACATTGGTATTTTTGCCG  GTAAAGAAGAGAAAATTCGC  GCAAGCGATTTTGGTCGTTA
201  TGCAATGCTGTGTCAATGCC  ATACCAATAATCCGGATCGT  CTGCTGCTGGTTGCACAGTG  TTTTGAGCACTGTTTGAG  TTGATGATCATTATTGTGAT
301  GATCAGAGCCTGGGTGGTCG  TCCGGAACCGTTGCAGAAA  CCTGAGCTTTGCACTGACC  GCAATTGATCCGGTTTATCT  GCCGAGCCGTTTGATAAAG
401  AACTGCTGAAACAGCAGATG  TGTGATCCGGTGATTCGTGG  TCTGCTGGCATATATGAAAC  GTGTGCCAGTTTTGTACC  CCGAGCCAGGTTGCCCGTGT
501  TCGTCAGATTACCATGGCA  TGTTTGTACCATGGCAGCC  GAAGGTCCTGGCGTCTGTA  TGGCACCCAGCCGACCGTTG  CCGAATATCTGGCAAGCCGT
601  CAGGTAAATAGCTTTTGGCC  GTGTCTGGTCTGATTGATC  TGATTGGTGGTTATGAAGTT  CCGGCAAAACCTATAGCCG  TCCGGATATTATCATGTGTA
701  CCGCACTGGCCAGCCTGGCA  ACCACCTGGTTAATGATCT  GTATAGCGCATATAAAGAGC  ACCTGAACGAAACCGGTGAT  TTTAAACTGCCGTACCTGCT
801  GGCAGCACGTATAATTGTA  GCCTGCAAGAAGCCATTGAT  CTGGCAGCAGATATTATGTA  TGCAGTGATGGAAGAATATG  AACGCTCGCATGCAACCCCTG
901  ATGAAAGGCACCCGTAGTCC  GTTTCTGCGTCTTATCTGA  CCGGTCTGAGCACCTGGATT  GGTGGCAATCTGGAATGGCA  TAAACATAGCGCACGCTATC  ATATCTAA
```
