# Supplementary material for: Heterologous expression of 2-methylisoborneol / 2 methylenebornane biosynthesis genes in Escherichia coli yields novel C11-terpenes
Source: PubMed Central journal article supplement (PMC5908152; doi:10.1371/journal.pone.0196082), 2018-04-19
Supplement: pone.0196082.s007.pdf [file pone.0196082.s007.pdf]

### S5 Fig. *mibsc* sequence optimized in codon usage for *E. coli*

```
1   ATGCCGATAGCGGCACCT  GGGTACACCGCCTCCGGAAC  AGGGTCCGACCCTCCGACA  ACCCTGCCGGATGTTCCGGC  ACCGGTTATTCCGAGCGCAA
101  GC GTTACCAGCGCAGCAAGC  GATTTTCTGGCAGCACTGCA  TCCGCCTGTTACCGTTCGGG  ATCCTGCACCTCCGCCTCCG  CCTGCACCGGCAGCAGGTAA
201  TCCTCCGGATACCGTTACCG  GTGATAGCGTTTCTGCAGCGT  ATTCTGCGTGGTCCGACCGG  TCCGGGTACAACCAGTCTGG  CTCCGGCAGTTCGTATAGGT
301  CGTCAGCCTGGTCCGGAAGC  ACCGGCAAGTGCACCGCCCTG  CAGCAGGTCTGCAGTTCCG  GGTCGTATCATCATCCGGT  GCCTGAACCTGATCCGGTTC
401  GTGTGAAGAAGTTAGCCGT  CGTATTAACGTTGGGCAGA  AGATGAAGTTCAGCTGTATC  CGGAAGAATGGGAAGTCCAG  TTGATGGTTTTAGCGTTGG
501  TCGTTATATGGTTGGTTGTC  ATCCTGATGCACCGACCGTT  GATCATCTGATGCTGGCAAC  CCGTCTGATGGTTCAGAAA  ATGCAGTTGATGATTGCTAT
601  TGCGAAGATCATGGTGGTAG  TCCGGTTGGTCTGGGTGGTC  GTCGCTGCTGGCACATACC  GCAATTGATCATTTTCATAG  CACCGCAGAAATATACCCGGA
701  CCTGGCAGGCAAGCCTGGCA  GCAGATGCACC CGCTCGTGC  ATATGATAGCGCAATGGGTT  ATTTTGTTCGTGCAGCAACC  CCGAGCCAGAGCGATCGTTA
801  TCGTCATGATATGGCACGTC  TGCATCTGGGTTATCTGGCA  GAAGGTGCCTGGGCACAGAC  CGGTCATGTTCCGGAAAGTT  GGGAAATCTGGCAATGCGT
901  CAGTTAATAAATTTCTGCC  GTGCCGACATTACCGATA  CCGTTGGTGGTTATGAACTG  CCTGCCGATCTGCATGCAGC  TCCGGATATGCAGCGTGTTA
1001  TTGCACTGGCAGGTAATGCA  ACCACCATTGTTAATGATCT  GTACAGCTATACCAAAGAGC  TGAATAGTCCGGGTCGTAT  CTGAATCTGCCGGTTGTTAT
1101  TGCCGAACGTGAACAGCTGT  GTGAACGTGATGCATATCTG  AAAGCAGTTGAAGTGCATAA  TGAAGTGCAGCATAGCTTTG  AAGCAGCAGCAGCCGATCTG
1201  GCCGAAGCATGTCGCTGCC  TCCGGTCTCGGTTTCTGTC  GTGGTGTTCAGCATGGGTT  GATGGTAACCATGATTGGCA  TCGTACCAATACCTATCGTT
1301  ATAGTCTGCCGATTTTTGG  TAA
```
