# Supplementary material for: Heterologous expression of 2-methylisoborneol / 2 methylenebornane biosynthesis genes in Escherichia coli yields novel C11-terpenes
Source: PLOS journal article supplement (doi:10.1371/journal.pone.0196082), 2018-04-19
Supplement: S1 (10.1371/journal.pone.0196082.s001) [file journal.pone.0196082.s001.pdf]

**S1 Table. Oligos and RBS sequences used in this study (overhangs of primers are underlined)**

| Name                       | Sequence                                                           |
|----------------------------|--------------------------------------------------------------------|
| mk20                       | GAGCTCGCTTGGACTCCT                                                 |
| mk23                       | <u>TTAATTAAGACGTCGGTGCCTAATGAGT</u>                                |
| mk24                       | <u>ACAGGAGTCCAAGCGAGCTCGCGGCGTTGTGACAATTTACC</u>                   |
| mk25                       | <u>ACTCATTAGGCACCGACGTCTTAATTAAGGACGCACACCGTGGAAA</u>              |
| mk7                        | CCTTAATTCTGACGAAATGCC                                              |
| mk8                        | CCTAAGGATCCAAACTCGAGTAA                                            |
| mk78x                      | GCATTTTCGTCAGAATTAAGGCCTAAGGATCCAAACTCGAG                          |
| mk26                       | <u>AGCTGGATCCTCCTAAGATCTTTTGAATTCTGAAATT</u>                       |
| mk10                       | TTAGTGTCGTCTTAACCTTAGACTAGTCCCAGGTGGGGAATTGTTATCCG<br>CTC          |
| mk11                       | ACCCTCGAGTCTGGTAAAGA                                               |
| mk12                       | <u>AGTCTAAAGTTAAGACGACACTAAGGAGGATATAGATGACCACCGAAACC</u><br>ACCAC |
| mk13                       | <u>TCTTTACCAGACTCGAGGGTTTACACACGATCTGCGGCAA</u>                    |
| RBS ( <i>mbsp</i> )        | CGAAACTAATCGCAGTATAATAAGGAGGTAAGTC                                 |
| RBS ( <i>mbsm</i> )        | AGAAGAACACGGGGTCAATAAGGAGGTTAATT                                   |
| RBS ( <i>mibsg</i> )       | CGAGAGACGCGCTCGCCATTTAAGGAGGGTCTTC                                 |
| RBS ( <i>mibsc</i> )       | AATTCAGTAAACAGCATAAGGAGAGTAACAT                                    |
| RBS<br>( <i>gppmtase</i> ) | CTAAAGTTAAGACGACACTAAGGAGGATATAG                                   |
