# Supplementary material for: Heterologous expression of 2-methylisoborneol / 2 methylenebornane biosynthesis genes in Escherichia coli yields novel C11-terpenes
Source: PLOS journal article supplement (doi:10.1371/journal.pone.0196082), 2018-04-19
Supplement: S2 (10.1371/journal.pone.0196082.s002) [file journal.pone.0196082.s002.pdf]

**S2 Table. Monoterpenoids detected in the headspace of four C11-terpene production strains (11-p, 11-m, 11-g, 11-c) and one control strain without GPP-MTase and TS (10-0)**

| #  | Compound <sup>b</sup>  | Detected in culture of strain |      |      |      |      | Identified by <sup>a</sup> | RI   |
|----|------------------------|-------------------------------|------|------|------|------|----------------------------|------|
|    |                        | 11-p                          | 11-c | 11-g | 11-m | 10-0 |                            |      |
| 1  | cyclofenchene          | x                             |      |      |      |      | SI, RI                     | 882  |
| 2  | 2-bornene              | x                             |      |      |      |      | SI, RI                     | 906  |
| 3  | tricyclene             | x                             |      |      |      |      | SI, RI                     | 923  |
| 4  | $\alpha$ -thujene      | x                             |      |      |      |      | SI, RI                     | 928  |
| 5  | $\alpha$ -pinene       | x                             |      |      | x    |      | Ref                        | 934  |
| 6  | monoterpene            | x                             |      |      |      |      |                            | 940  |
| 7  | camphene               | x                             |      | x    |      |      | SI, RI                     | 950  |
| 9  | sabinene               | x                             |      |      | x    |      | SI, RI                     | 974  |
| 10 | $\beta$ -pinene        | x                             |      |      | x    |      | Ref                        | 977  |
| 13 | $\beta$ -myrcene       | x                             | x    | x    | x    | x    | Ref                        | 991  |
| 14 | $\alpha$ -phellandrene | x                             | x    |      |      | x    | Ref                        | 1009 |
| 16 | limonene               | x                             | x    | x    | x    | x    | Ref                        | 1031 |
| 18 | (Z)- $\beta$ -ocimene  | x                             | x    |      |      | x    | Ref                        | 1038 |
| 21 | (E)- $\beta$ -ocimene  | x                             | x    |      |      | x    | SI, RI                     | 1049 |
| 23 | $\gamma$ -terpinene    | x                             | x    |      |      |      | Ref                        | 1060 |
| 29 | linalool               |                               | x    | x    |      | x    | Ref                        | 1099 |
| 34 | alloocimene            |                               |      |      |      | x    | Ref                        | 1129 |
| 38 | isopulegol             |                               | x    |      |      | x    | Ref                        | 1149 |
| 39 | citronellal            | x                             | x    | x    |      | x    | Ref                        | 1151 |
| 40 | isoneral               |                               | x    |      |      | x    | SI, RI                     | 1162 |
| 42 | borneol                | x                             |      |      |      |      | SI, RI                     | 1170 |
| 43 | terpinen-4-ol          | x                             |      |      |      |      | Ref                        | 1180 |
| 44 | isogeranial            |                               | x    |      |      | x    | SI, RI                     | 1180 |
| 52 | $\gamma$ -isogeraniol  | x                             | x    |      |      |      | SI, RI                     | 1218 |
| 53 | $\beta$ -citronellol   | x                             | x    | x    | x    | x    | Ref                        | 1227 |
| 54 | (Z)-isogeraniol        | x                             | x    |      |      | x    | SI RI                      | 1232 |
| 56 | neral                  | x                             | x    | x    |      | x    | Ref                        | 1241 |
| 57 | geraniol               | x                             | x    | x    |      | x    | Ref                        | 1254 |
| 58 | geranial               | x                             | x    | x    |      | x    | Ref                        | 1270 |

<sup>a</sup> Compounds were identified via comparison of mass spectra and RIs of reference compounds (Ref) or mass spectra of the NIST mass spectral library (v14) and RIs (SI, RI) published by Adams (29).

<sup>b</sup> Compounds with unknown structures were named regarding their highest  $m/z$  value as monoterpene ( $m/z = 136$ ) or monoterpene alcohol ( $m/z = 154$ ).
