# Supplementary material for: Heterologous expression of 2-methylisoborneol / 2 methylenebornane biosynthesis genes in Escherichia coli yields novel C11-terpenes
Source: PLOS journal article supplement (doi:10.1371/journal.pone.0196082), 2018-04-19
Supplement: S4 (10.1371/journal.pone.0196082.s004) [file journal.pone.0196082.s004.pdf]

### S3 Fig. *mbsm* sequence optimized in codon usage for *E. coli*

```
1   ATGAGCGCAGCAGATGCACT  GAGCGGTTTTGCAGCCGATG  CCTGTCAAGTTTTGCGCCT  GATGCGCTGAGTGGCTTTGC  CGCAGCAATTCGGCAGCAA
101  CCGGTCGTGCACCGAGCGCA  GAACAGCCAGGTTGCAGC  AGGTCCGACCGCACTGGATC  GTCTGACCGATAGCACCGGT  CTGGGTCGTAGCGCATTTCG
201  TATTCCGCGTAGCCGATGC  TGCTCCGCCCTACCGATGAT  GGTGTGCCGGAAGTGTTTTG  TCCGGGTCGGGTTCTGTGATG  ATCCGGCACTGGGTGAAACC
301  GTTAATGATGGTATTGTTGA  ATGGGAGGTCAGGTTGGTA  TTTATCCGGGTCAGCTGGAT  CGCCTGCGTGATATAACTT  TGGTCGTCTGATTATGCTGA
401  CCGATCCGGCAACCAATGAT  CCTGATCGTCTGCTGGCAGC  AGCAAAATGTGTTGTGTCAG  AATGGGCAACCGATGATTAT  GTTGTGATGAAGT TAGCCT
501  GGGTGCAGATCCGGCAGTTG  TTGGTAGCCGCTGGCAAAA  CTGCATGCCGTGTTGATCC  TGCCCGTCTGCCCTGCACGTT  ATGCACCGCAGCTGGATGCA
601  TATCGTCGTGATGAACCGAT  TGCAACCGCCTTTCGTAGCG  CCATGGAACATCTGGCACGT  TATACCACCGTTGCACAGCT  GGGTCGTTTT CAGCATCAGC
701  TGGGTATTCTGTTCTGGCA  TGGAAATCAAGAAGCAGATTG  GCACGTAATGGTCGTACCC  CTCCGGTTTGGGAATATCTG  GTTCAGCGTCATCTGAATAA
801  CTTTCTGCCTCCGATGGTTC  TGGTTGATGCAGTTGCAGGT  TATGAACTGAGTCCGGATGA  ATTTTTGATCCGCGTGTTTC  GTCGTGCCTATACCACAGCA
901  GCACATGGCAAATGTTCTGCT  GAATGATATTCATAGCGGCA  CCTGTGAAAAGCGATACCGAT  TTTAATCTGCCTCGTGTGAT  TAGCATTGAAGAGGGTTGTA
1001 GCCTGCGTGTGCCGTTACC  CGTACCGTTGAAATTCATAA  TGAACAGTGCATGCGTTTG  TTGCCGATGCAGCAACCCTG  AGCCTGATTGGTAGCCCGAA
1101 TCTGCGTCGTTTTCTGGCAG  ATATTTGGCATGGCTGGGT  GGTAGTCGTGAATGGCATGC  AACCACCAAGTCGTTATCATG  GTGAAGCAACCACCGTAGC  TAA
```
