# Supplementary material for: Heterologous expression of 2-methylisoborneol / 2 methylenebornane biosynthesis genes in Escherichia coli yields novel C11-terpenes
Source: PLOS journal article supplement (doi:10.1371/journal.pone.0196082), 2018-04-19
Supplement: S6 (10.1371/journal.pone.0196082.s006) [file journal.pone.0196082.s006.pdf]

#### S4 Fig. *mibsg* sequence optimized in codon usage for *E. coli*

```
1   ATGCCGGTGCCGGAACAGCC   TCCGCCTCGTAGCAGTCTGC   CGGAAGCAGTTACCCGTTTT   GGTGCAAGCGTTCTGGGTGC   AGTTGCAGCACGTGCACATG
101  ATAGCGAAGCAACCGTTGGT   GGTCCGAGCGGTGGTCTGTC   GCTGCCTAGTCTCCGGCAG   GTCTGAGTTTTGGTCCGCT   AGTCCGGCAGCACCGAGCGC
201  AGATGTTCCAGCACCGGAAG   CACCGGGTCTGGTGCAGAT   CTGGAACGCTCTGCTGTGG   TCCGCATGGTCTGGGACCG   CAGGCTGCGTCTGACACCG
301  GGTAAAGAACGTCGGTTCC   GGCAACCGCACGTGAAGGTC   GTCCGATTCCGGGTCTGTAT   CATCATCCGGTGCCTGAACC   GGATGAAGCACGTGTTGAAG
401  AAGTTAGCCGTCGTATATA   GCATGGGCACTGGATGAAGT   GAGCCTGTATCCGGAAGAAT   GGAAGAAGCAGTTGATGTT   TTAGCGTTGGTCTGATAT
501  GGTGGTGTGTCATCTGATG   CACCGACCGTTGATCATCTG   ATGCTGGCAACCCGCTGAT   GGTTCAGAAAATGCAAGTTG   ATGATTGCTATTGCAAGAT
601  CATGGTGGTAGTCCGGTTGG   TCTGGGTGAACCGCTGCTGC   TGGCACATACCGCACTGGAT   CCGCTGTATACCGCACGCGA   ATATCAGCCTGGTTGGGCG
701  CAAGCCTGCATGCCGATGCA   CCGCGTCTGCATATCGTAG   CGCAATGGATTATTTTGTTC   GTGCAGCAGGTCCGAGCAG   GCAGATCGTCTGCGTCATGA
801  TATGGCACGCTCTGCATCTGG   GTTATCTGGCAGAAGCAGCC   TGGGCTCAGCAGGATCAGGT   TCCGGAAGTTTGGGAATATC   TGGCAATGCGTCAGTTTAA
901  AACTTTTCGTCCTGTCGAC   CATTACCGATACCGTGGGTG   GTTATGAACTGCCTGCCGAT   CTGCATGCACAGGCAGCAAT   GCAGAAAAGTGATTGCACTGG
1001 CAAGTAATGCAACCACCATT   GTGAATGATCTGTACAGCTA   TACCAAAGAAGTGGCAGCTC   CGGGTCGTCTGTAATCTG   CCGGTTGTTATTGCAAGAACG
1101 CGAAGGCTGAGCGATCAGG   ATGCATATCTGAAAAGCGTG   GAAATTCAAACTGAACTGAT   GCATGCCTTTGAAAAGCGAAG   CAGCAGCACTGGCAGCAGCA
1201 TGTCGGTGCCGAGCGTTCA   GCGTTTTCTGCGTGGTGTG   CAGCATGGGTTGATGGTAAT   CATATTGGCATCTAGCAA   TACCTATCGTTATAGCCTGC
1301 CGGATTTTGGTAA
```
