# Supplementary material for: Heterologous expression of 2-methylisoborneol / 2 methylenebornane biosynthesis genes in Escherichia coli yields novel C11-terpenes
Source: PLOS journal article supplement (doi:10.1371/journal.pone.0196082), 2018-04-19

**S8 Fig. Total ion chromatograms of HS-SPME-GCMS analyses of the control strains 0-0, 10-0 and 11-0 compared to the one of the production strain 11-p.**

Labelled peaks are listed in Table 3 and S2 Table

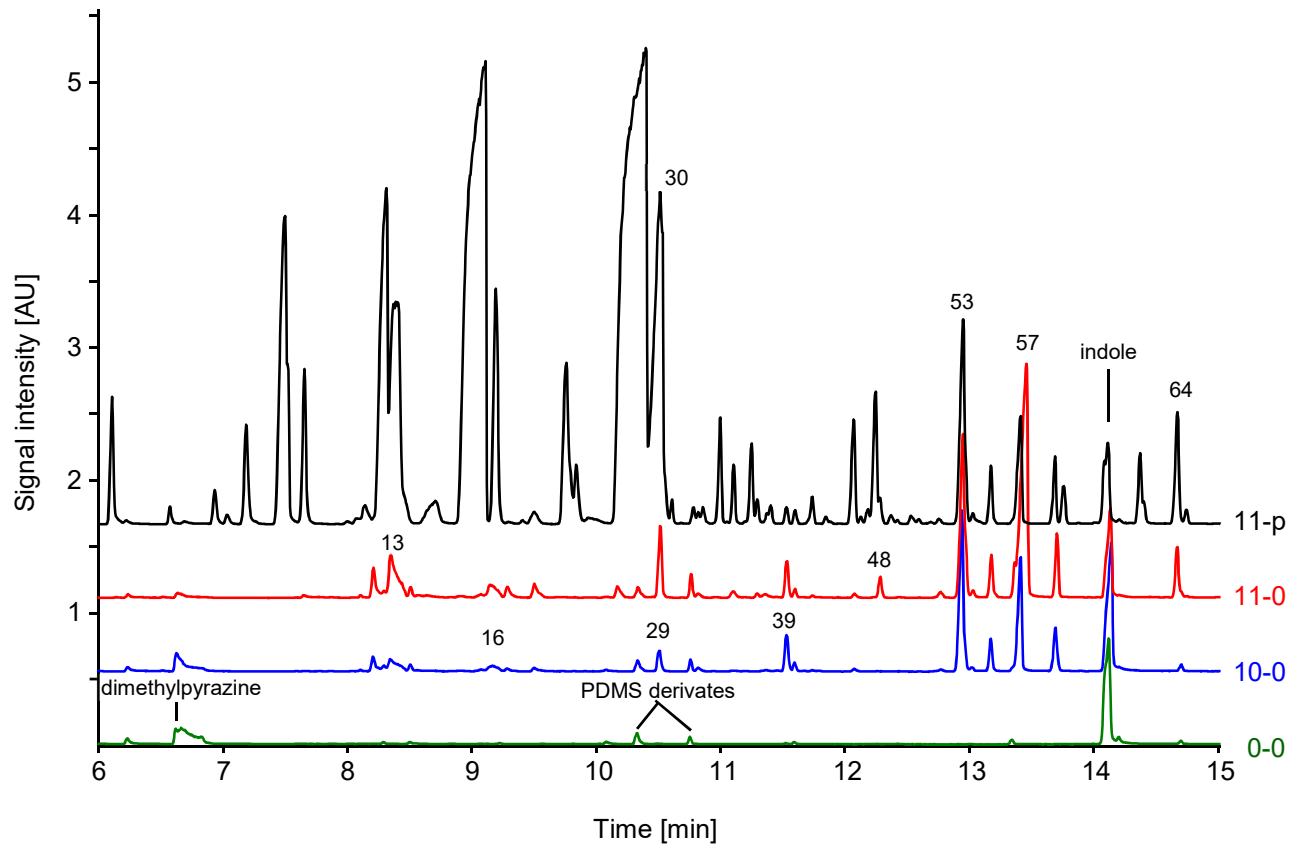

Supplement: S10 (10.1371/journal.pone.0196082.s010) [file journal.pone.0196082.s010.pdf]
